# Supplementary material for: DHA modulates MANF and TREM2 abundance, enhances neurogenesis, reduces infarct size, and improves neurological function after experimental ischemic stroke
Source: PubMed Central journal article supplement (PMC7564189; doi:10.1111/cns.13444), 2020-08-05

**Figure S1. Full unedited blots for Figure 1E.**

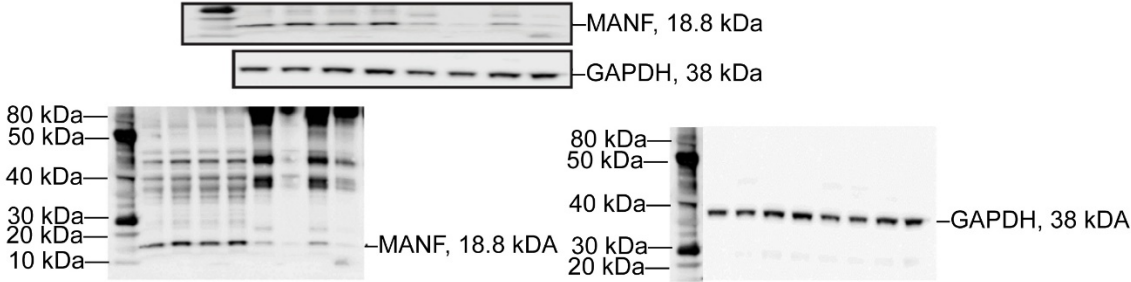

**Figure S2. Full unedited blots for Figure 1F.**

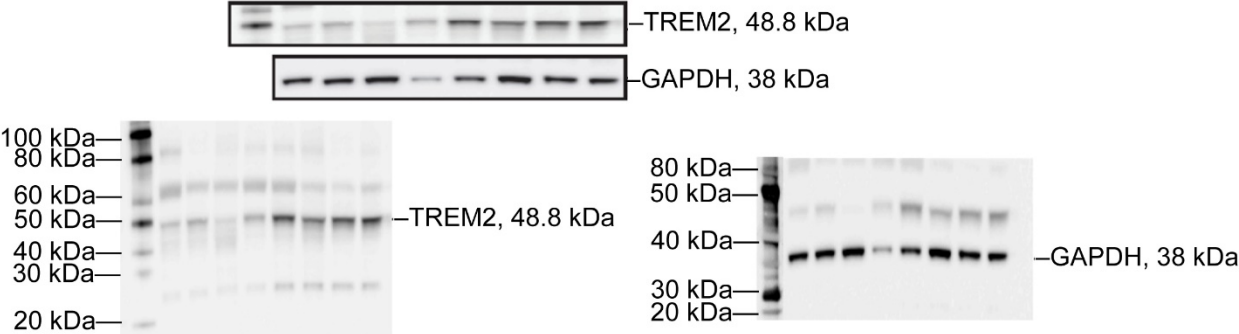

Supplement: CNS-26-1155-s001.pdf [file CNS-26-1155-s001.pdf]
